# Supplementary material for: Revisiting the INSPIRE trial: Antibody profiling reveals high prevalence of occult autoimmunity
Source: Research Square preprint supplement (doi:10.21203/rs.3.rs-8022922/v1), 2025-11-20
Supplement: Supplementary file 1 [file 3c85ad1909770ea4611bb5ba.xlsx]

## Sheet: Final
Supplemental Table 1. Conventional Protein and RNA Immunoprecipitation of INSPIRE Samples
Subject	ID	Alt IDs	IP-MS ID	Select	Protein Bands	RNA	Final Summary	Notes	conflicting results in dup	duplicate	Order	Best gel	2nd gel	3rd gel	4th gel	RNA date	Reviewed
006-006019	1	2	2	29	100 smear,w63, w35, w31	negative	prob topo, prob 35, prob 31	Requires clinical testing for anti-Scl-70		no	1	43	29			2020-01-27
006-006019	2									yes	2
006-006020	12	19		29	w60, w52		poss Ro 60,other			no	3	43	29
006-006020	19									yes	4
003-003040	32	33		24	w78		other			no	5	40	33	24
003-003040	33									yes	6
011-011010	37	38		10	negative >65		negative >65	gel run off at 65		no	7	10
011-011010	38									yes	8
028-028024	46	47		10	negative >65		negative >65	gel run off at 65		no	9	10
028-028024	47									yes	10
037-037029	58	59		10	negative >65		negative >65	gel run off at 65		no	11	10
037-037029	59									yes	12
038-038009	66	67		10	negative >65		negative >65	gel run off at 65		no	13	10
038-038009	67									yes	14
001-001008	76	84		29	140, 100, 74, 72, 58		poss topo	Requires clinical testing for anti-Scl-70		no	15	29
001-001008	84									yes	16
001-001013	85	86		29	negative		negative			no	17	43	29
001-001013	86									yes	18
002-002002	96	98	3	29	63		poss KS			no	19	43	KS topo	29
002-002002	98									yes	20
001-001001	102	103	4	26	100,110,74,w63	neg v tRNA	prob topo, poss KS, other	Requires clinical testing for anti-Scl-70		no	21	RP Ku	41	26		2020-01-27
001-001001	103									yes	22
026-026011	109	110			negative (hi bkgd)		negative (hi bkgd)	hi bkgd gel		no	23	32
026-026011	110									yes	24
026-026012	115	116		31	37, 28		poss Th, other			no	25	44	31
026-026012	116									yes	26
026-026014	121	122		31	165, 30	negative	other			no	27	U3 OJ	44	31		2020-03-20
026-026014	122									yes	28
006-006030	132	133	5	31	st50, st56	prob snRNP	prob snRNP, prob 56			no	29	Ro 60	35	44	31	2020-02-27
006-006030	133									yes	30
039-039017	142	143		11	negative		negative			no	31	11
039-039017	143									yes	32
034-034020	152	153			no sample		no sample			no	33
034-034020	153									yes	34
034-034002	161	162		11	mult hi bands, 155,142,140, 40, 33	negative	other	like #182		no	35	U3 OJ	U2 SAE	33	11	2020-03-20
034-034002	162									yes	36
034-034009	172	173		11	68		other			no	37	11
034-034009	173									yes	38
908-908005	181	182	6	25	mult hi bands, 110, 100,st80,78,st70, 61,st52,st46, st35,31	negative	poss 35, poss 31, poss Ku, other	no band on good RNA gel		no	39	Mi-2 EJ	40	25		2019-12-10
908-908005	182									yes	40
908-908006	183	184	7	25	negative		poss Ro 60, other			no	41	25					Gel 25 with weak 54
908-908006	184									yes	42
702-702003	198	199		25	140, 58	negative	other			no	42.5	25				2020-03-02
702-702003	199									yes	42.6
604-604001	205	206	8	29	90	hi RNA	other			no	45	RP Ku	43	29		2020-01-27
604-604001	206									yes	46
606-606018	218	219		26	w56 , 50		poss 56, poss Jo-1			no	47	U2 SAE	41	26
606-606018	219									yes	48
205-205004	220	221	9		st 56, 260	negative	prob 56, other			no	49	Ro 60	44			2020-02-27
205-205004	221									yes	50
205-205005	226	227	10		82, 70, st56	5.8S	prob 56, other			no	51	Ro 60	U2 SAE	44	32	2020-02-27
205-205005	227									yes	52
205-205006	239	240			negative (hi bkgd)		negative (hi bkgd)	hi bkgd gel		no	53	32
205-205006	240									yes	54
205-205007	250	671			negative		negative			no	55	44	32
205-205007	671									yes	56
606-606011	251	252		29	70		other			no	57	43	Mi-2 EJ	29		2020-02-25
606-606011	252									yes	58
606-606016	264	265		26	negative >34		negative			no	59	41	26
606-606016	265									yes	60
606-606017	281	282		26	negative >34		negative	gel run off at 34		no	61	26
606-606017	282									yes	62
903-903002	314	315		27	110		poss PL-12			no	63	41	27
903-903002	315									yes	64
902-902004	327	328		27	negative		negative			no	65	27
902-902004	328									yes	66
501-501006	331	332			no sample		no sample			no	67
501-501006	332									yes	68
802-802018	378	379		25	negative		negative			no	69	25
802-802018	379									yes	70
803-803001	396	397		25	38		poss Th			no	71	40	25
803-803001	397									yes	72
803-803002	400	401	11	25	negative	negative	negative			no	73	25				2019-12-10
803-803002	401									yes	74
607-607003	406	407	12	25	negative	negative	negative			no	75	40	25			2019-12-10
607-607003	407									yes	76
702-702006	414	415		26	negative >34		negative	gel run off at 34		no	77	26
702-702006	415									yes	78
704-704006	422	423		26	44?		other	gel run off at 34		no	79	26
704-704006	423									yes	80
606-606001	428	429		26	35?		poss 35			no	81	26
606-606001	429									yes	82
602-602011	445	446		26	negative >34		negative			no	83	41	26
602-602011	446									yes	84
501-501004	483	484		26	negative >34		negative	gel run off at 34		no	85	26
501-501004	484									yes	86
003-003045	492	493		25	negative		negative			no	87	25
003-003045	493									yes	88
006-006042	501	502		19	250, poss 56		poss 56, other			no	89	37	19
006-006042	502									yes	90
006-006040	503	504		19			negative	gel run off at 32		no	91	19
006-006040	504									yes	92
006-006050	511	512		19	200?, 120?		other			no	93	37	19
006-006050	512									yes	94
006-006033	521	522		19	200?, 35?, 31?		poss 35, poss 31			no	95	37	19
006-006033	522									yes	96
032-032017	535	536		14	negative >42		negative >42	gel run off at 42		no	97	14
032-032017	536									yes	98
032-032019	541	542		14	65		other			no	99	35	14
032-032019	542									yes	100
032-032021	551	552		14	negative >42		negative >42	gel run off at 42		no	101	14
032-032021	552									yes	102
005-005019	561	562		19	w63		poss KS			no	103	38	19
005-005019	562									yes	104
032-032022	563	564		14	100		poss topo	Requires clinical testing for anti-Scl-70		no	105	14	35
032-032022	564									yes	106
004-004017	571	581		19	negative		negative	gel run off at 32		no	107	19
004-004017	581									yes	108
005-005002	572	573		19	negative		negative	gel run off at 32		no	109	19
005-005002	573									yes	110
003-003029	591	592		19	negative		moderate titer CCP; negative IP	gel run off at 32		no	111	19
003-003029	592									yes	112
018-018038	601	602		14	negative >42		negative >42	gel run off at 42		no	113	14
018-018038	602									yes	114
018-018031	611	612		14	35?, 31?		poss 35, poss 31			no	115	35	14
018-018031	612									yes	116
018-018042	621	636		14	90, 60		poss Ro 60, other	gel run off at 42		no	117	14
018-018042	636									yes	118
018-018035	622	623		14	60		poss Ro 60	gel run off at 42		no	119	14
018-018035	623									yes	120
037-037028	631	632		20	negative >34		negative >37	gel run off at 34		no	121	20
037-037028	632									yes	122
038-038013	641	642		20	negative >34		negative >37	gel run off at 34		no	123	20
038-038013	642									yes	124
037-037003	651	652		20	160, 60		poss Ro 60, other	gel run off at 34		no	125	20
037-037003	652									yes	126
037-037006	661	662	13	19	63, st56, 78	negative	prob 56, poss KS, other			no	127	Ro 60	38	19		2020-02-27
037-037006	662									yes	128
015-015006	703	704		13	100?, w58, w40		other			no	129	Ro 60	34	12	13
015-015006	704									yes	130
017-017003	708	709		16	w35	U1 v 5.8S	poss 35, prob snRNP	requires clinical testing for Sm/RNP antibodies		no	131	PM-Scl	34	16	13	2020-03-02
017-017003	709									yes	132
018-018001	721	722	14,15	16	st 63		prob KS			no	133	KS topo	34	36	16
018-018001	722									yes	134
018-018005	727	728		13	negative >58		negative >58	gel run off at 58		no	135	13
018-018005	728									yes	136
802-802007	745	746			negative (hi bkgd)		negative (hi bkgd)	hi bkgd gel		no	137	32
802-802007	746									yes	138
501-501007	751	752		19	w35?		poss 35	gel run off at 32		no	139	19
501-501007	752									yes	140
902-902003	760			19	negative		negative	gel run off at 32		no	141	19
904-904009	761	975		20	61 (ID 761 gel 20), 35?		poss 35, other	different subjects same ID - 975	no	no	142	U3 OJ	38	20
904-904009	975							see 974		yes	143
032-032001	766	767	32	20	st 56	?tRNA	prob 56			no	144	Ro 60	38	20		2020-02-27
032-032001	767									yes	145
909-909003	782	783		20	270,130,110,65		other			no	146	38	20
909-909003	783									yes	147
202-202003	787	795		24	>300		other			no	148	21	24
202-202003	795									yes	149
607-607002	788	790	16	21	w63, 56, 27	lo RNA, ?tRNA	poss KS, poss snRNP, poss 56			no	150	Ro 60	38	21		2020-02-27
607-607002	790									yes	151
301-301003	791	792		24	w60		poss Ro 60			no	152	38	24	21	24
301-301003	792									yes	153
602-602010	830	832		13	65		other	gel run off at 58		no	154	13
602-602010	832									yes	155
606-606012	831	831		13	negative >58		negative >58	gel run off at 58		no	156	13
606-606012	834									yes	157
707-707010	838	838		13	68kd		other	gel run off at 58		no	158	13
707-707010	851									yes	159
003-003044	847	848		13	75, 63		poss KS, other	gel run off at 58		no	160	35
003-003044	848									yes	161
901-901005	876	877	17	28	mult hi bands, 63,60,56,45,37,31		poss KS, poss Ro 60, poss 56, poss 31, other			no	162	42	28
901-901005	877									yes	163
025-025021	882	883		28	65, 60		other			no	164	28
025-025021	883									yes	165
025-025026	890	891		19	72		other	gel run off at 32		no	166	19
025-025026	891									yes	167
018-018018	892	897		18	130, w 36, w32	tRNA, SSA	poss Th, other			no	168	Mi-2 EJ	37	18		2020-02-25
018-018018	897									yes	169
017-017006	893	894		17	78, 70,46, 38, 31	hi RNA	poss Th, poss 31, other			no	170	Mi-2 EJ	36	17		2020-02-25
017-017006	894									yes	171
026-026016	899	904		19	negative		high titer CCP; negative IP	gel run off at 32		no	172	19
026-026016	904									yes	173
032-032009	926	1300		23	neg >48		negative >48			no	174	23
032-032009	1300									yes	175
032-032003	927	928		23	145		other			no	176	21	23
032-032003	928									yes	177
044-044003	933	934		20	100, 35, 31	wSm	poss topo, prob 35, prob 31, prob snRNP			no	178	Mi-2 EJ	38	20		2020-02-25
044-044003	934									yes	179
038-038014	939	940		19	st52		other			no	180	37	19
038-038014	940									yes	181
035-035025	941	951		19	60, 35?, 31?	hi bands	poss 31			no	182	PM-Scl	19			2020-03-02
035-035025	951									yes	183
106-106014	964	965		19	85, 75	hi RNA, lo RNA	other			no	184	Mi-2 EJ	37	19		2020-02-25
106-106014	965									yes	185
032-032031	970	972	18	20	125, 110, 63	negative	poss KS, poss PL-12, other			no	186	KS topo	38	20		2019-12-10
032-032031	972									yes	187
105-105014	971	981		20	250, 170, 85	hi RNA	other			no	188	20	38	Mi-2 EJ		2020-02-25
105-105014	981									yes	189
034-034013	974	975		20	88, 61, 60 (ID 974 gel 20)	negative	other	different subjects same ID - 975	no	no	190	20				2019-12-10
034-034013	975							see 761		yes	191
102-102008	982	995		20	105, 75		other			no	192	38	20
102-102008	995									yes	193
606-606015	1001	1002		10	bands		other	gel run off at 65		no	194	10
606-606015	1002									yes	195
905-905012	1013	1014		9	negative		negative			no	196	9
905-905012	1014									yes	197
901-901007	1022	1023		9	105, 63		poss KS, other			no	198	9
901-901007	1023									yes	199
901-901009	1035	1036			st56	negative	prob 56	mislabeled 1039 on gel 9		no	200	33	Ro 60	9		2020-02-27
901-901009	1036									yes	201
901-901015	1046	1047	19	25	63, 35,31		poss KS, prob 35, prob 31			no	202	40	U2 SAE	25
901-901015	1047									yes	203
301-301013	1054	1055	20	25	130, 32	negative	other			no	204	25				2019-12-10
301-301013	1055									yes	205
702-702008	1065	1066	21	25	w160	negative	other			no	206	40	PM-Scl	25		2019-12-10
702-702008	1066									yes	207
605-605020	1073	1074	22	25	70	negative	other			no	208	KS topo	40	25
605-605020	1074									yes	209
027-027002	1080	1081		25	negative		negative			no	210	25
027-027002	1081									yes	211
027-027004	1093	1094	23	25	40	negative	other			no	212	40	25			2019-12-10
027-027004	1094									yes	213
027-027008	1106	1107	24	25	48		other			no	214	25
027-027008	1107									yes	215
803-803010	1113	1114		9	st 52, 35?,31?, st 27		poss 35,poss 31, other			no	216	9
803-803010	1114									yes	217
039-039020	1122	1123	25	9	65, st56, st 35, st 31	tRNA?	prob 56, prob 35, prob 31, other	33 much stronger than other gels, neg on 9	yes	no	218	33	Ro 60	U2 SAE	9	2020-01-29
039-039020	1123									yes	219
039-039021	1131	1132		9	negative		negative			no	220	9
039-039021	1132									yes	221
048-048003	1141	1142		26	w100		poss topo	gel run off at 34		no	222	26
048-048003	1142									yes	223
907-907003	1178	1179	26	25	negative	U2?	poss snRNP			no	224	25				2019-12-10
907-907003	1179									yes	225
908-908001	1188	1189	27	25	w63, st 23	hi RNA	other	no tRNA on good RNA gel		no	226	40	25			2019-12-10
908-908001	1189									yes	227
901-901010	1202	1203	28	25	70,st 35, 31	negative	prob 35, prob 31, other			no	228	40	U2 SAE	25		2020-01-29
901-901010	1203									yes	229
901-901012	1215	1216		25	63, 86		poss KS, other			no	230	25
901-901012	1216									yes	231
106-106003	1222	1227		29	smear, 50?, 52?,63?, 65?		poss KS, poss Jo-1, other	hi bkgd gel		no	232	29
106-106003	1227									yes	233
032-032029	1237	1238		31	82,61, st 50		poss Jo-1, other			no	234	43	31
032-032029	1238									yes	235
050-050004	1246	1247	29	31	Ro 60, 70,95	Ro yRNA	Ro 60, other	requires clinical testing for SSA/Ro		no	236	Ro 60	43	31		2020-02-27
050-050004	1247									yes	237
030-030002	1251	1495		13	70, 68		other			no	238	13
030-030002	1495									yes	239
003-003038	1252	1253		13	63		poss KS	gel run off at 58		no	240	13
003-003038	1253									yes	241
023-023008	1254	1255		13	75		poss EJ			no	242	34	13
023-023008	1255									yes	243
903-903001	1256	1261		24	negative >34		low titer CCP; negative IP >34			no	244	24	20
903-903001	1261									yes	245
037-037025	1257	1258	30,31	24	st110, w63,w60,w56	hi RNA,ctRNA? v bkgd	poss snRNP			no	246	RP Ku	Mi-2 EJ	40	38,24	2020-01-27
037-037025	1258									yes	247
008-008006	1265	1270		24	90, 75, 42		other			no	248	38	24	20
008-008006	1270									yes	249
905-905009	1274	1287		20	72, 61, 35		poss 35, other	gel run off at 34		no	250	20
905-905009	1287									yes	251
032-032009	1300			21	st 56		prob 56			no	251.5	21
003-003020	1304	1313		23	250, 145		other			no	252	39	23	21
003-003020	1313									yes	253
704-704011	1321	1322		23	100, 54		other			no	254	39	21	23
704-704011	1322									yes	255
001-001014	1339	1340		14	84, 75		other			no	256	35	14
001-001014	1340									yes	257
006-006043	1341	1342		14	84, 76		poss EJ, other	gel run off at 42		no	258	14
006-006043	1342									yes	259
018-018036	1346	1347		14	negative >42		negative >42	gel run off at 42		no	260	14
018-018036	1347									yes	261
036-036019	1363	1364		14	negative >42		negative >42	gel run off at 42		no	262	14
036-036019	1364									yes	263
909-909001	1406	1407		14	130?,32	negative	other			no	264	PM-Scl	35	14		2020-03-02
909-909001	1407									yes	265
702-702011	1409	1416		14	135120	U2 vs bkgd	other			no	266	RP Ku	35	14		2020-01-27
702-702011	1416		1							yes	267
702-702009	1414	1415		14	50		poss Jo-1			no	268	35	14
702-702009	1415									yes	269
907-907004	1418	1419		14	negative >42		negative >42	gel run off at 42		no	270	14
907-907004	1419									yes	271
701-701001	1440	1441		28	negative		negative			no	272	28
701-701001	1441									yes	273
003-003050	1446	1453		30	110?		poss PL-12	poor quality gel		no	274	30
003-003050	1453									yes	275
901-901013	1447	1451			negative (hi bkgd)		negative (hi bkgd)	hi bkgd gel		no	276	30
901-901013	1451									yes	277
301-301012	1448	1449		28	140, st70, 60, 46		poss Ro 60, other			no	278	42	28
301-301012	1449									yes	279
025-025023	1484	1485		13	68		other	gel run off at 58		no	280	13
025-025023	1485									yes	281
030-030002	1495			13	st70, st68		other	gel run off at 58		no	281.5	13
016-016001	1501	1502		25	w150, 35, 31	U1,U2	prob 35, prob 31, other	requires clinical testing for Sm/RNP antibodies		no	282	25	PM-Scl	40		2020-03-02
016-016001	1502									yes	283
015-015021	1508	1509		25	68		other			no	284	25
015-015021	1509									yes	285
907-907005	1546	1547		9	hi doublet		other			no	286	9
907-907005	1547									yes	287
605-605008	1555	1556			36		other			no	288	30
605-605008	1556									yes	289
605-605012	1564	1565		27	63		poss KS			no	290	27
605-605012	1565									yes	291
606-606010	1572	1573		9	63 kD		poss KS			no	292	9
606-606010	1573									yes	293
018-018007	1862	1863		19	270, 150, 95,85,40,27	negative	other			no	294	U3 OJ	38	19		2020-03-20
018-018007	1863									yes	295
011-011008	1865	1866		19	negative		negative	gel run off at 32		no	296	19
011-011008	1866									yes	297
028-028028	1867	1868		19	negative		negative	gel run off at 32		no	298	19
028-028028	1868									yes	299
028-028035	1869	1870		19	240		other	gel run off at 32		no	300	19
028-028035	1870									yes	301
005-005013	1952	1953		13	negative >58		negative >58	gel run off at 58		no	302	13
005-005013	1953									yes	303
003-003028	1955	1956		13	63?		poss KS	gel run off at 58		no	304	13
003-003028	1956									yes	305
003-003024	1957	1958		14	negative >42		negative >42	gel run off at 42		no	306	14
003-003024	1958									yes	307
003-003023	1959	1960		14	75		other			no	308	35	14
003-003023	1960									yes	309
026-026007	2282	2283	33	31	st56, 38	hi RNA	prob 56, poss Th, other			no	310	Ro 60	44	31		2020-02-27
026-026007	2283									yes	311
025-025029	2285	2286		12	negative		negative			no	312	12
025-025029	2286									yes	313
026-026018	2290	2291		12	negative		negative			no	314	12
026-026018	2291									yes	315
026-026019	2294			12	negative		negative			no	316	U2 SAE	34	12
018-018013	2295	2296		12	160		other			no	317	12	34
018-018013	2296									yes	318
032-032030	2347	2348	34	28	st115, 110 ,w65, 60, 56, 28	WU2, U11?	poss snRNP, other	mislabeled as 3247 on RNA		no	319	RP Ku	42	28		2020-01-27
032-032030	2348									yes	320
102-102013	2356						missing			no	321	7
106-106002	2357	2358		28	65, 60		negative			no	322	28
106-106002	2358									yes	323
802-802009	2511	2512		32	58		other	hi bkgd gel		no	324	32
802-802009	2512									yes	325
802-802013	2528	2529			negative (hi bkgd)		negative (hi bkgd)	hi bkgd gel		no	326	32
802-802013	2529									yes	327
802-802014	2545	2546			90		other	hi bkgd gel		no	328	32
802-802014	2546									yes	329
802-802015	2557	2558		17	st 56		prob 56	hi bkgd gel; run off at 37		no	330	36	17
802-802015	2558									yes	331
709-709001	2574	2575		17	80		other	hi bkgd gel; run off at 37		no	332	36	17
709-709001	2575									yes	333
709-709002	2581	2582		17	56		prob 56	hi bkgd gel; run off at 37		no	334	36	17
709-709002	2582									yes	335
802-802006	2589	2590		17	negative>35		negative >35	hi bkgd gel; run off at 37		no	336	36	17
802-802006	2590									yes	337
803-803008	2605	2606		16	insufficient sample		insufficient sample	gel run off at 48		no	338	16
803-803008	2606									yes	339
803-803009	2612	2613		16	negative >48		negative >48	gel run off at 48		no	340	16
803-803009	2613									yes	341
803-803005	2619	2620			negative >48		negative >48	gel run off at 48		no	342	16
803-803005	2620									yes	343
702-702005	2631	2632		16	negative >48		negative >48	gel run off at 48		no	344	16
702-702005	2632									yes	345
030-030003	2634	2635		15	84		other	gel run off at 40		no	346	15
030-030003	2635									yes	347
015-015020	2639	2640		15	negative >40		negative >40	gel run off at 40		no	348	15
015-015020	2640									yes	349
030-030015	2647	2670		15	w56		poss 56			no	350	Ro 60	15	35
030-030015	2670									yes	351
030-030016	2660	2661		23	75, 60, 56		poss 56, other			no	352	23	21	23
030-030016	2661									yes	353
003-003006	2673	2694		23	250 smear, st190	wtRNA db?	other	check novel aS		no	354	U3 OJ	23	39	22	2020-03-20
003-003006	2694									yes	355
003-003005	2674	2675		23	110		poss PL-12			no	356	39	23
003-003005	2675									yes	357
001-001006	2682	2683		23	negative>37		negative >37			no	358	23
001-001006	2683									yes	359
001-001003	2686	2689		23	negative>37	negative	negative >37			no	360	22	23			2020-01-27
001-001003	2689									yes	361
025-025020	2699	2700	35	23	135, 100, 70, 68, 35, w 31	negative	poss topo, poss 35, poss 31, other			no	362	39	RP Ku	40	21	2020-01-27
025-025020	2700									yes	363
025-025022	2718	2719			negative>37		negative >37	mislabeled 2791 on gel 21		no	364	21
025-025022	2719									yes	365
035-035023	2725	2726	36	23	220, 210, 160,145, 110, 64, 35,31	negative	prob 35, prob 31, other			no	366	U3 OJ	KS topo	39	23	2019-12-10
035-035023	2726									yes	367
006-006014	2738	2739		15	84, 48		other			no	368	35	15
006-006014	2739									yes	369
006-006016	3251	3252		15	negative >40		negative >40	gel run off at 40		no	370	15
006-006016	3252									yes	371
006-006005	3260	3261		15	negative >40		negative >40	gel run off at 40		no	372	15
006-006005	3261									yes	373
006-006017	3262	3263		15	60		poss Ro60			no	374	35	15
006-006017	3263									yes	375
032-032016	3270	3271		15	negative >40		negative >40	gel run off at 40		no	376	15
032-032016	3271									yes	377
026-026006	3280	3281		15	negative >40		negative >40	gel run off at 40		no	378	15
026-026006	3281									yes	379
032-032012	3282	3283		15	negative >40		negative >40	gel run off at 40		no	380	15
032-032012	3283									yes	381
032-032011	3287	3288		15	60, 58		poss Ro 60, other	gel run off at 40		no	382	15
032-032011	3288									yes	383
030-030025	3321	3322		15	negative >40		negative >40	gel run off at 40		no	384	15
030-030025	3322									yes	385
030-030013	3328	3329		15	negative >40		negative >40	gel run off at 40		no	386	15
030-030013	3329									yes	387
030-030005	3340	3341		15	negative >40		negative >40	gel run off at 40		no	388	15
030-030005	3341									yes	389
030-030004	3343	3344		15	st110kd		prob PL-12			no	390	17	15
030-030004	3344									yes	391
030-030029	3356	3357		17	negative>35		negative >35	hi bkgd gel; run off at 37		no	392	17
030-030029	3357									yes	393
030-030007	3366	3367		15	negative >40		negative >40	gel run off at 40		no	394	15
030-030007	3367									yes	395
030-030008	3374	3375		15	hi bands, st 220, 120, 61, 44	hi RNA	other			no	396	Mi-2 EJ	35	15		2020-02-25
030-030008	3375									yes	397
003-003016	3384	3385		14	negative >42		negative >42	gel run off at 42		no	398	14
003-003016	3385									yes	399
003-003017	3395	3396		14	65, 63		poss KS, other	st bands on 14		no	400	35	14
003-003017	3396									yes	401
003-003010	3401	3402	37	14	150, 125,st 84	hi RNA	other			no	402	RP Ku	35	14		2020-01-27
003-003010	3402									yes	403
002-002027	3410	3411		14	negative >42		negative >42	gel run off at 42		no	404	14
002-002027	3411									yes	405
044-044002	3415	3416		16	negative >48		negative >48	gel run off at 48		no	406	16
044-044002	3416									yes	407
045-045009	3425	3426		17	65kd		other	hi bkgd gel; run off at 37		no	408	17
045-045009	3426									yes	409
045-045012	3431	3432		17	negative>35		negative >35	hi bkgd gel; run off at 37		no	410	17
045-045012	3432									yes	411
045-045004	3444	3445		17	130, 75		other	hi bkgd gel		no	412	36	17
045-045004	3445									yes	413
018-018012	3457	3458		18	negative>33		negative >33			no	414	37	18
018-018012	3458									yes	415
026-026008	3467	3468		18	60,56, w35		poss Ro 60, poss 56, poss 35			no	416	RP Ku	37	18
026-026008	3468									yes	417
026-026009	3474	3475		18	negative		negative			no	418	36	18
026-026009	3475									yes	419
018-018023	3483	3485		17	100, weak 72kd		poss topo	hi bkgd gel; run off at 37		no	420	17
018-018023	3485									yes	421
039-039001	3488	3489		17	negative>35		negative >35	hi bkgd gel; run off at 37		no	422	17
039-039001	3489									yes	423
039-039003	3497	3498		17	76		poss EJ	hi bkgd gel		no	424	36	17
039-039003	3498									yes	425
015-015013	3530	3536		17	negative>35		negative >35	hi bkgd gel		no	426	36	17
015-015013	3536									yes	427
015-015010	3538	3539		17	smear, st130, 84, 54, 36	negative	other	hi bkgd gel; run off at 37		no	428	U3 OJ	36	17		2020-03-20
015-015010	3539									yes	429
003-003030	3620	3621	38	12	negative	negative	negative			no	430	U2 SAE	34	12		2020-01-29
003-003030	3621									yes	431
003-003031	3624	3625			negative (hi bkgd)		negative	hi bkgd gel		no	432	30
003-003031	3625									yes	433
003-003034	3630	3631			negative (hi bkgd)		negative	hi bkgd gel		no	434	30
003-003034	3631									yes	435
105-105012	3650	3651		13	135	negative	other			no	436	PM-Scl	34	13		2020-03-02
105-105012	3651									yes	437
104-104010	3652	3653		13	negative >58		negative >58	gel run off at 58		no	438	13
104-104010	3653									yes	439
104-104005	3654	3775		13	135, 66,63, 61		poss KS, other	gel run off at 58		no	440	13
104-104005	3775									yes	441
002-002007	3655	3663	39	29	(63), st56, 37?, 31	5.8S, lo RNA, wtRNA?	prob 56, poss 31, other; (poss KS)	Gel 43 shows st63 absent from other gels	yes	no	442	Ro 60	43	29	U3 OJ	2020-02-27
002-002007	3663									yes	443
002-002006	3657	3751		16	negative		negative			no	444	16
002-002006	3751									yes	445
104-104003	3658	3659		16	negative >48		negative >48	gel run off at 48		no	446	16
104-104003	3659									yes	447
105-105009	3665	3666	40	18	63	tRNA	KS			no	448	37	18			2020-01-29
105-105009	3666									yes	449
803-803004	3708	3709		18	35		prob 35			no	450	U2 SAE	37	18
803-803004	3709									yes	451
032-032025	3714	3715	41	18	175,165, 88, st33	negative	other			no	452	U2 SAE	36	18		2020-01-29
032-032025	3715									yes	453
032-032026	3723	3724		18	st 63, 60, 50,36	tRNA	KS, poss Ro 60, other			no	454	KS topo	U3 OJ	37	18	2019-12-10
032-032026	3724									yes	455
032-032033	3732	3733	42	18	120, 35, 31?		poss 35, poss 31, other			no	456	37	18
032-032033	3733									yes	457
902-902008	3742	3743		18	negative>33		negative			no	458	37	18
902-902008	3743									yes	459
002-002006	3751			16	negative >48		negative >48	gel run off at 48			459.5	16
105-105001	3777	3778		13	negative >58		negative >58	gel run off at 58		no	460	13
105-105001	3778									yes	461
018-018016	3806	3807			negative (hi bkgd)		negative (hi bkgd)	hi bkgd gel		no	462	32
018-018016	3807									yes	463
015-015012	3808	3809		17	60		poss Ro 60	hi bkgd gel		no	464	36	17
015-015012	3809									yes	465
604-604002	3814	3880			w140, 95	hi bands	other	mislabeled as 3841 on RNA		no	466	PM-Scl	34	12		2020-03-02
604-604002	3880						other			yes	467	34	12
604-604003	3815	3816		12	negative		negative			no	468	12
604-604003	3816									yes	469
909-909004	3817	3818		12	44		other			no	470	34	12
909-909004	3818									yes	471
909-909007	3823	3824	43	24	270, 175,70,68, 61, 58,43, 27	negative	other			no	472	KS topo	40	38	24, 20	2019-12-10
909-909007	3824									yes	473
607-607001	3836	3837		24	42, 33		other			no	474	38	24	20
607-607001	3837									yes	475
704-704001	3845	3846		24	68, 60		poss Ro 60, other			no	476	24	20
704-704001	3846									yes	477
704-704004	3852	3853		24	negative >34		negative >34			no	478	40	24	20
704-704004	3853									yes	479
012-012027	3882	3883		17	negative>35		negative >35	hi bkgd gel; run off at 37		no	480	17
012-012027	3883									yes	481
012-012018	3894	3895		17	negative>35		negative >35	hi bkgd gel; run off at 37		no	482	36	17
012-012018	3895									yes	483
012-012019	3905	3906		17	(ID 3906) 76, 60		poss Ro 60, other	ID 3905-different subjects same ID--see gels		no	484	17	36	PM-Scl
012-012019	3906									yes	485
015-015014	3905	3915			(ID 3915) 70	U1, U2,U11?,U12?, vs Sm	snRNP	requires clinical testing for Sm/RNP antibodies		no	486	17	36			2020-03-02
015-015014	3915									yes	487
025-025017	3921	3922	44		56, 65	negative	prob 56			no	488	Ro 60	44	32		2020-02-27
025-025017	3922									yes	489
025-025024	3930	3931		32	63		poss KS	hi bkgd gel		no	490	32
025-025024	3931									yes	491
025-025025	3943	3944			190??		other	hi bkgd gel		no	492	32
025-025025	3944									yes	493
018-018045	3953	3954			negative (hi bkgd)		negative (hi bkgd)	hi bkgd gel		no	494	32
018-018045	3954									yes	495
028-028006	3963	3964	45	27	200, 61, 36	U1,U2, Th? v artifact	prob snRNP, poss Th			no	496	U2 SAE	41	27		2020-01-29
028-028006	3964									yes	497
027-027011	3975	3976	46	27	130, 65, st31	negative	prob 31, other	mislabeled 3972 on gel 27		no	498	U2 SAE	41	27		2020-01-29
027-027011	3976									yes	499
008-008004	3985	3986		27	200, st 90,70, 72, 65, 44		other			no	500	41	27
008-008004	3986									yes	501
038-038016	3993	3994		27	200		other			no	502	41	27
038-038016	3994									yes	503
036-036002	4002	4003		17	st110kd		prob PL-12	hi bkgd gel; run off at 37		no	504	17
036-036002	4003									yes	505
036-036004	4007	4008		17	58, 54		other	hi bkgd gel		no	506	36	17
036-036004	4008									yes	507
016-016020	4016	4017		18	negative>33		negative >33			no	508	18
016-016020	4017									yes	509
017-017004	4026	4027		18	52		other	hi bkgd gel		no	510	36	18
017-017004	4027									yes	511
017-017005	4043	4044	47	18	60, 56, 31,23,78	U2, tRNA db	KS, prob 56, poss snRNP, poss 31			no	512	Ro 60	PM-Scl	37	18	2020-02-27
017-017005	4044									yes	513
017-017007	4060	4061		18	smear, 63, 60?, 56?		poss KS, poss Ro 60, poss 56			no	514	37	18
017-017007	4061									yes	515
037-037002	4064	4065		17	76, 39	prob snRNP	prob snRNP	check U5		no	516	U3 OJ	36	17		2020-03-20
037-037002	4065									yes	517
038-038010	4069	4070		17	84		other	hi bkgd gel		no	518	36	17
038-038010	4070									yes	519
038-038003	4079	4080		17	61		other	hi bkgd gel		no	520	36	17
038-038003	4080									yes	521
038-038005	4086	4087		10	mult hi bands, 70, 60?, st 56	tRNA?	prob 56, other	33 much stronger than other gels		no	522	33	PM-Scl	10		2020-03-02
038-038005	4087									yes	523
011-011022	4096	4097		10	70, 68		other	on gel 10 like 4443,7376, neg on gel 33	yes	no	524	10	33
011-011022	4097									yes	525
036-036014	4104	4105		10	negative >65		negative >65	gel run off at 65		no	526	10
036-036014	4105									yes	527
035-035021	4113	4114		10	negative >65		negative >65	gel run off at 65		no	528	10
035-035021	4114									yes	529
035-035024	4120	4121		10	w hi bands, 70, 33		other			no	530	33	10
035-035024	4121									yes	531
026-026021	4135	4136		10	negative >65		negative >65	gel run off at 65		no	532	10
026-026021	4136									yes	533
012-012016	4139	4140		10	negative >65		negative >65	gel run off at 65		no	534	10
012-012016	4140									yes	535
012-012017	4149	4153			w61		other	mislabeled 453 on gel 11		no	536	33	11
012-012017	4153									yes	537	33
012-012006	4158	4163		10	negative >65		negative >65	gel run off at 65		no	538	10
012-012006	4163									yes	539
007-007020	4168	4169		21	(ID 4168) negative>37		negative >37	different subjects same ID - 4168 on gel 21 is negative	no	no	540	21
007-007020	4169									yes	541
011-011013	4169	4192		21	65, 60, st 56 (ID 4192 gel 21, 39)		prob 56, poss Ro 60, other	different subjects same ID - 4192 on gel 21 indicates Ro60	no	no	542	39	21
011-011013	4192									yes	543
007-007021	4176	4177		21	weak hi bands, st 35		prob 35			no	544	39	21
007-007021	4177									yes	545
011-011014	4200	4201		21	100,63,56, 32 dblt		prob topo, poss 56,poss KS, other	Requires clinical testing for anti-Scl-70		no	546	U3 OJ	21	39
011-011014	4201									yes	547
034-034003	4216	4217	48	28	180, 115,75,st 27	hi RNA	other			no	548	42	U2 SAE	28		2020-01-29
034-034003	4217									yes	549
904-904010	4220	4221	49	28	90, 80, 58, 38, 25	poss Th, poss snRNP	poss Th, poss snRNP, other			no	550	Ro 60	42	28		2020-02-27
904-904010	4221									yes	551
909-909002	4233	4234			92,76,60,w56,w52		poss EJ, poss Ro 60, poss 56, poss Jo-1			no	552	U2 SAE
909-909002	4234									yes	553
803-803003	4252	4253		27	hi bands, 82, 65, st 63, poss 35		prob KS, poss 35, other			no	554	KS topo	42	27
803-803003	4253									yes	555
105-105002	4260	4261		16	60		poss Ro 60	hi bkgd gel		no	556	36	16
105-105002	4261									yes	557
105-105003	4270	4271		16	270, st110, 72, 70, 58		poss PL-12, other	gel run off at 48		no	558	16
105-105003	4271									yes	559
104-104001	4283	4284		16	75, 65		other			no	560	35	16
104-104001	4284									yes	561
102-102011	4290	4291		16	58		other	gel run off at 48		no	562	16
102-102011	4291									yes	563
002-002026	4304	4305		26	250, 120, 60, 46	negative	other			no	564	PM-Scl				2020-03-02
002-002026	4305									yes	565
002-002022	4315	4316		26	w 150, w110	hi RNAs	other			no	566	PM-Scl	26			2020-03-02
002-002022	4316									yes	567
002-002023	4327	4328	51	29	st110, 70		poss PL-12			no	568	43	RP Ku	29	26
002-002023	4328									yes	569
003-003014	4339	4340		26	st 68 v w 56		poss 56, other	68 missing on gel 26		no	570	41	26
003-003014	4340									yes	571
038-038006	4348	4349		26	56		poss 56	based on gel 41	no	no	572	41	26
038-038006	4349									yes	573
606-606014	4357	4358		26	negative >34		other			no	574	41	26
606-606014	4358									yes	575
704-704007	4374	4375		26	negative >34		negative	gel run off at 34		no	576	26
704-704007	4375									yes	577
704-704008	4383	4384		26	negative		negative			no	578	41	26
704-704008	4384									yes	579
028-028010	4392	4394		31	110		poss PL-12			no	580	31
028-028010	4394									yes	581
028-028015	4405	4406		31	112		other			no	582	31
028-028015	4406									yes	583
028-028016	4417	4418		11	negative		negative			no	584	11
028-028016	4418									yes	585
026-026020	4428	4429		31	170?		other			no	586	31
026-026020	4429									yes	587
025-025008	4433	4434		10	negative >65		negative >65	gel run off at 65		no	588	10
025-025008	4434									yes	589
025-025011	4443	4444		10	70, 68		other	gel run off at 65		no	590	10
025-025011	4444									yes	591
018-018039	4458	4459		10	mult hi bands, 95, 72, 68 db, 44		other	gel run off at 65		no	592	33	10
018-018039	4459									yes	593
006-006028	4466	4467		10	86		other	gel run off at 65		no	594	10
006-006028	4467									yes	595
003-003041	4471	4472			negative (hi bkgd)		negative (hi bkgd)	hi bkgd gel		no	596	32
003-003041	4472									yes	597
012-012026	4482	4484		11	68		other			no	598	11
012-012026	4484									yes	599
011-011007	4493	4495		11	st200, st 85, st72, st 76, st 46, 27	tRNA, U1, hi RNA, 5.8S, 5S	EJ, snRNP, poss Th, other	33 much stronger than other gels, poss Sm		no	600	33	Mi-2 EJ	11		2020-02-25
011-011007	4495									yes	601
602-602007	4501	4502		16	negative >48		negative >48	gel run off at 48		no	602	16
602-602007	4502									yes	603
602-602008	4503	4504	52	16	st56, 31	negative	prob 56, poss 31			no	604	Ro 60	35	16		2020-02-27
602-602008	4504									yes	605
603-603006	4505	4506		16	negative >48		negative	gel run off at 48		no	606	16
603-603006	4506									yes	607
605-605017	4507	4508		16	negative >48		negative	gel run off at 48		no	608	16
605-605017	4508									yes	609
028-028031	4516	4517		16	insufficient sample		insufficient sample	gel run off at 48		no	610	16
028-028031	4517									yes	611
012-012020	4521	4522		15	negative >40		negative >40	gel run off at 40		no	612	15
012-012020	4522									yes	613
028-028029	4527	4529		15	35?, 31?	U1,U11?,U12?, U4?	poss 35, poss 31, poss snRNP	requires clinical testing for Sm/RNP, lo bands like 611		no	614	PM-Scl	15	35		2020-03-02
028-028029	4529									yes	615
102-102001	4530	4531		13	35		poss 35			no	616	34	35	13
102-102001	4531									yes	617
202-202001	4532	4533		13	negative >58		negative >58	gel run off at 58		no	618	13
202-202001	4533									yes	619
606-606005	4642	4643		13	85		other	gel run off at 58		no	620	13
606-606005	4643									yes	621
606-606008	4647	4658		13	negative >58		negative >58	gel run off at 58		no	622	13
606-606008	4658									yes	623
012-012022	4662	4663		15	110		poss PL-12			no	624	35	15
012-012022	4663									yes	625
030-030017	4844	6160			st35?		poss 35	hi bkgd gel		no	626	30
030-030017	6160									yes	627
030-030022	4856	4857			negative (hi bkgd)		negative	hi bkgd gel		no	628	30
030-030022	4857									yes	629
030-030001	4867	4868		28	210, 205, 54		negative			no	630	28
030-030001	4868									yes	631
028-028020	4876	4877			negative (hi bkgd)		negative	hi bkgd gel		no	632	30
028-028020	4877									yes	633
802-802016	4934	4935		16	63		poss KS			no	634	35	16
802-802016	4935									yes	635
802-802019	4948	4949		16	w63		poss KS	gel run off at 48		no	636	16
802-802019	4949									yes	637
701-701003	4961	4962		16	insufficient sample		insufficient sample	gel run off at 48		no	638	16
701-701003	4962									yes	639
003-003047	4974	4975	53	16	65, 61, 56		poss 56, other			no	640	KS topo	35	16
003-003047	4975									yes	641
001-001010	4995	4996		12	63		poss KS			no	642	34	12
001-001010	4996									yes	643
005-005011	5014	5015		19	negative		negative	gel run off at 32		no	644	19
005-005011	5015									yes	645
005-005017	5016	5017		19	w63		poss KS, poss 35, poss 31	hi bkgd gel; run off 32		no	646	38	19
005-005017	5017									yes	647
005-005016	5018	5019		19	200, smear		other			no	648	37	19
005-005016	5019									yes	649
005-005012	5024	5025		19	negative		negative	gel run off at 32		no	650	19
005-005012	5025									yes	651
005-005010	5042	5043		27	negative		negative			no	652	27
005-005010	5043									yes	653
005-005005	5044	5045		27	negative		negative			no	654	27
005-005005	5045									yes	655
202-202005	5050	5105		27	w110, 38		poss Th, other			no	656	U3 OJ	42	27
202-202005	5105									yes	657
205-205001	5101	5107	54	29	108, 82, 80, st63, 60, 35, 31, 42	U2 vs bkgd	poss 56, poss 35, poss 31, other	no 63 on PM-Scl gel	no	no	658	RP Ku	29	27	PM-Scl, 43	2020-01-27
205-205001	5107										659
001-001016	5256	5257		12	180?, 150?, 65, 42		other			no	660	12	U2 SAE	34	Mi-2 EJ
001-001016	5257									yes	661
001-001017	5267	5268		12	105		other			no	662	12
001-001017	5268									yes	663
006-006001	5275	5276		12	negative		negative			no	664	12
006-006001	5276									yes	665
035-035020	5281	5282		28	95		other			no	666	28
035-035020	5282									yes	667
006-006044	5289	5290		28	negative		negative			no	668	28
006-006044	5290									yes	669
006-006049	5295	5296	55	29	70, st63, 60, 52, 45		prob KS, poss Ro 60, other			no	670	KS topo	43	29	28
006-006049	5296									yes	671
006-006024	5303	5304		28	negative		negative			no	672	28
006-006024	5304									yes	673
028-028003	5315	5316	56	29	150, 120, 82,72,70,43, 34, 32	5S, hi RNA	other			no	674	43	29	U2 SAE		2020-01-29
028-028003	5316									yes	675
028-028004	5328	5329	57	29	310,300,170,150,st50,43	tRNA v artifact	poss Jo-1, other	bands not on all gels		no	676	RP Ku	43	Mi-2 EJ	41, 29	2020-01-27
028-028004	5329									yes	677
027-027012	5342	5343	58	26	60, 56	negative	prob 56, poss Ro 60			no	678	U3 OJ	41	26		2020-02-27
027-027012	5343									yes	679
028-028009	5346	5347		26	negative >34	hi RNA, U4 or U11	poss snRNP	gel run off at 34		no	680	26				2020-02-25
028-028009	5347									yes	681
006-006036	5357	5358			negative (hi bkgd)		negative (hi bkgd)	hi bkgd gel		no	682	32
006-006036	5358									yes	683
006-006037	5362	5363			negative (hi bkgd)		negative (hi bkgd)	hi bkgd gel		no	684	32
006-006037	5363									yes	685
006-006038	5367	5368			72		other	hi bkgd gel		no	686	32
006-006038	5368									yes	687
008-008001	5373	5376			negative		negative	mislabeled 5375 on gel 31		no	688	31
008-008001	5376									yes	689
006-006007	5380	5381		31	negative		negative			no	690	31
006-006007	5381									yes	691
002-002011	5391	5392		31	negative		negative			no	692	31
002-002011	5392									yes	693
002-002012	5401	5402		31	negative		negative			no	694	31
002-002012	5402									yes	695
001-001005	5408	5409		31	30		other; also moderate titer CCP			no	696	31
001-001005	5409									yes	697
018-018040	5414	5415		31	negative		negative			no	698	31
018-018040	5415									yes	699
023-023007	5420	5421		31	155		other			no	700	31
023-023007	5421									yes	701
024-024003	5428	5429		31	negative		negative			no	702	31
024-024003	5429									yes	703
026-026010	5437	5438		31	280?, 150?, st 56	hi RNAs	prob 56, other			no	704	Ro 60	Mi-2 EJ	44	31	2020-02-27
026-026010	5438									yes	705
027-027007	5444	5444		31	115,90, 86, 63,		poss KS			no	706	31
027-027007	5445									yes	707
027-027009	5451	5452		31	smear, 100?		poss topo			no	708	31
027-027009	5452									yes	709
027-027010	5465	5466	59	31	115,76,63,52,35	hi RNAs, U2?, U11?	poss 35, poss snRNP, other			no	710	RP Ku	44	31		2020-01-27
027-027010	5466									yes	711
026-026022	5472	5476		31	100, 52		poss topo, poss Jo-1			no	712	31
026-026022	5476									yes	713
015-015019	5491	5492	60	11	200, 140, 135,105, w56, w35, w31	negative	poss 35, poss 31	33 much stronger than other gels, poss Sm		no	714	33	U2 SAE	11		2020-01-29
015-015019	5492									yes	715
901-901016	5501	5502	61	11	65,52		other	33 much stronger than other gels		no	716	33	KS topo	11
901-901016	5502									yes	717
605-605004	5517	5518		11	negative		negative			no	718	11
605-605004	5518									yes	719
032-032010	5527	5528		11	105		other			no	720	33	11
032-032010	5528									yes	721
005-005007	5533	5537		11	negative		negative			no	722	11
005-005007	5537									yes	723
301-301008	5541	5542		11	90		other			no	724	11
301-301008	5542									yes	725
301-301010	5546	5548		11	w140		other			no	726	34	11
301-301010	5548									yes	727
301-301011	5562	5563	62	11	w140, 125, st 56	hi RNA	prob 56, other			no	728	33	11			2020-01-29
301-301011	5563									yes	729
602-602005	5564	5565		11	90, 52		other			no	730	11	34
602-602005	5565									yes	731
301-301002	5573	5574	63	12	175,130, st63,56?	poss U4 or U11, hi RNA, tRNA?	poss KS, poss 56			no	732	PM-Scl	U2 SAE	34	12	2020-01-29
301-301002	5574									yes	733
301-301004	5587	5589			negative (hi bkgd)		negative	hi bkgd gel		no	734	30
301-301004	5589									yes	735
030-030032	5592	5598			300,168, 150,125,120, 82, 61,30, 28		other			no	736	43	30
030-030032	5598									yes	737
902-902006	5600	5601			negative		negative			no	738	43
902-902006	5601									yes	739
102-102012	5606	5618			negative (hi bkgd)		negative	hi bkgd gel		no	740	30
102-102012	5618									yes	741
105-105013	5622	5623			negative (hi bkgd)		negative	hi bkgd gel		no	742	30
105-105013	5623									yes	743
102-102009	5628	5629		43	250,120,60,54,37	hi RNA, lo RNA	poss Th, prob snRNP	poss U5		no	744	43	Mi-2 EJ	30		2020-02-25
102-102009	5629									yes	745
032-032027	5635	5636			270, 140		other	hi bkgd gel		no	746	30
032-032027	5636									yes	747
006-006002	5650	5651		11	w90		other			no	748	11
006-006002	5651									yes	749
006-006010	5658	5659		11	st 56, 110		prob 56, poss PL-12			no	750	11
006-006010	5659									yes	751
006-006004	5667	5668		11	63		poss KS			no	752	11
006-006004	5668									yes	753
006-006011	5671	5672		11	140, 84, 68, 65, 63, 60?	negative	poss KS, poss Ro 60, other	33 much stronger than other gels		no	754	PM-Scl	33	11		2020-03-02
006-006011	5672									yes	755
301-301007	5680	5681			negative (hi bkgd)		negative	hi bkgd gel		no	756	30
301-301007	5681									yes	757
034-034018	5689	5690	64		st 63, 43		prob KS, other			no	758	43	KS topo	30
034-034018	5690									yes	759
034-034007	5699	5700			negative (hi bkgd)		negative	hi bkgd gel		no	760	30
034-034007	5700									yes	761
904-904005	5707	5708			negative (hi bkgd)		negative	hi bkgd gel		no	762	30
904-904005	5708									yes	763
039-039008	5722	5723		24	35?, 31?		poss 35, poss 31			no	764	38	21	24
039-039008	5723									yes	765
039-039006	5731	5732		24	st 168, w105, w35, w31	hi RNA, U2? V bkgd	poss 35,poss 31, other			no	766	U3 OJ	Mi-2 EJ	40	38, 24	2020-02-25
039-039006	5732									yes	767
039-039007	5738	5739		24	60, 25		poss Ro 60, other			no	768	38	21	24
039-039007	5739									yes	769
105-105021	5749	5750	65	24	56, 70		prob 56, other			no	770	Ro 60	38	21	24
105-105021	5750									yes	771
905-905002	5761	5768		20	negative >34		negative >34	gel run off at 34		no	772	20
905-905002	5768									yes	773
905-905003	5774	5775		24	75, 50,35		poss Jo-1, poss 35, other			no	774	24	24	20
905-905003	5775									yes	775
802-802010	5776	5777		24	negative >34		negative >34			no	776	38	24	20
802-802010	5777									yes	777
901-901003	5795	5796		24	negative >34		negative >34			no	778	24	20
901-901003	5796									yes	779
038-038019	5812	5813		12	negative		negative	poor lane		no	780	34	12
038-038019	5813									yes	781
038-038025	5819	5820		12	negative		negative			no	782	34	12
038-038025	5820									yes	783
038-038029	5830	5831		13	negative		negative			no	784	U2 SAE	34	12	13
038-038029	5831									yes	785
038-038012	5840	5841		13	negative		negative			no	786	12	13
038-038012	5841									yes	787
003-003011	5853	5834		26	negative >34		negative			no	788	40	26
003-003011	5854									yes	789
007-007016	5860	5861	66	29	>300 smear, 88, 68, 61, 56, 28, 26	tRNA?	prob 56, other	U2 SAE gel -no 56,28, 26	yes	no	790	43	PM-Scl	U2 SAE	29	2020-01-29
007-007016	5861									yes	791
012-012002	5867	5868		26	160, 130, 90, 76,65, 56		prob 56, other	based on gel 41	no	no	792	41	Ro 60	26
012-012002	5868									yes	793
011-011015	5873	5874		29	35, 31		poss 35, poss 31			no	794	29
011-011015	5874									yes	795
026-026024	5915	5916			negative (hi bkgd)		negative (hi bkgd)	hi bkgd gel		no	796	32
026-026024	5916									yes	797
027-027018	5936	5937			negative (hi bkgd)		negative (hi bkgd)	hi bkgd gel		no	798	32
027-027018	5937									yes	799
028-028001	5945	5946			smear, 68,63,60, 52		poss ribo RNP			no	800	Mi-2 EJ	44
028-028001	5946									yes	801
006-006034	5989	5990			negative (hi bkgd)		negative (hi bkgd)	hi bkgd gel		no	802	32
006-006034	5990									yes	803
606-606009	6001	6745			negative (hi bkgd)		negative	hi bkgd gel		no	804	30
606-606009	6745									yes	805
032-032034	6016	6019		27	60		poss Ro 60			no	806	27
032-032034	6019									yes	807
032-032004	6020	6022		27	120, 44,35	negative	poss 35, other			no	808	PM-Scl	41	27		2020-03-02
032-032004	6022									yes	809
032-032007	6029	6030		27	st 72		other			no	810	41	27
032-032007	6030									yes	811
030-030031	6035	6036		27	63, 38		poss KS, poss Th			no	812	27
030-030031	6036									yes	813
005-005004	6071	6073		18	130		other			no	814	36	18
005-005004	6073									yes	815
004-004018	6081	6082		18	w135, 75, 56, 50		poss Jo-1			no	816	37	18
004-004018	6082									yes	817
004-004019	6094	6095		18	250, w150, w120, 43?		other			no	818	37	18
004-004019	6095									yes	819
016-016015	6101	6102		9	hi band, 72, 60		poss Ro 60,other			no	820	9
016-016015	6102									yes	821
016-016016	6107	6108		9	>250, 110, 74,	negative	poss PL-12, other			no	822	PM-Scl	33	9		2020-03-02
016-016016	6108									yes	823
003-003036	6114	6115	67	9	200, w63,95	hi RNA	other			no	824	33	RP Ku	9		2020-01-27
003-003036	6115									yes	825
034-034034	6126	6127		9	negative		negative			no	826	9
034-034034	6127									yes	827
034-034014	6134	6135		9	95, 72		other			no	828	9
034-034014	6135									yes	829
034-034023	6139	6140		9	130, 120, 100, w63, st 46	negative	poss topo, poss KS			no	830	U3 OJ	33	9		2020-03-20
034-034023	6140									yes	831
004-004012	6166	6167	68	18	>300, 250, (63), 56, 43, 35, 31	negative	prob 35, prob 31, other	63 missing on Mi-2, 37 gels, no tRNA on good RNA gel	yes	no	832	KS topo	Mi-2 EJ	37	18	2019-12-10
004-004012	6167									yes	833
012-012003	6262	6263		11	negative		negative			no	834	11
012-012003	6263									yes	835
012-012005	6272	6273		11	63, w60, 52?		poss Ro 60, poss KS			no	836	RP Ku	34	11
012-012005	6273									yes	837
036-036015	6282	6286					missing			no	838
036-036015	6286									yes	839
036-036005	6289	6290		11	150, w120,w115,w108,w100,st54,st35,st31	negative	prob 35, poss 31, other			no	840	PM-Scl	34			2020-03-02
036-036005	6290									yes	841
036-036013	6326	6327		23	50?		poss Jo-1, poss 56			no	842	23	39	22
036-036013	6327									yes	843
036-036018	6332	6333		23	negative>37		negative >37			no	844	23	22
036-036018	6333									yes	845
036-036016	6335	6336		23	negative>37		negative >37			no	846	23
036-036016	6336									yes	847
036-036017	6341	6342		23	180, 175, 130, 65	negative	other			no	848	U3 OJ	39	23	22	2020-03-20
036-036017	6342									yes	849
034-034015	6351	6352		27	110		poss PL-12			no	850	27
034-034015	6352									yes	851
606-606007	6359	6360		27	56		poss 56			no	852	41	27
606-606007	6360									yes	853
904-904011	6374	6375		29	240, 60, 56, 31, 25	hi RNA, U1	prob snRNP, poss 56, poss 31, other			no	854	43	Mi-2 EJ	29		2020-02-25
904-904011	6375									yes	855
905-905004	6385	6386		27	70		negative			no	856	27
905-905004	6386									yes	857
039-039010	6397	6398		16	negative >48		negative	gel run off at 48		no	858	16
039-039010	6398									yes	859
047-047001	6406	6407		16	52		other	gel run off at 48		no	860	16
047-047001	6407									yes	861
005-005001	6421	6425		14	63		poss KS			no	862	35	14
005-005001	6425									yes	863
004-004015	6431	6432		14	weak 100kd		poss topo	gel run off at 42		no	864	14
004-004015	6432									yes	865
016-016011	6446	6447					missing	not loaded on gel 9		no	866
016-016011	6447									yes	867
016-016013	6458	6459		9	negative		negative			no	868	9
016-016013	6459									yes	869
015-015015	6470	6471		9	negative		negative			no	870	9
015-015015	6471									yes	871
015-015018	6478	6479		9	mult hi bands, 120, 100, 78, 76, 65		other	inadequate load on M-2 EJ		no	872	33	9	Mi-2 EJ
015-015018	6479									yes	873
016-016008	6484	6485		26	negative >34		negative	gel run off at 34		no	874	26
016-016008	6485									yes	875
016-016010	6493	6494		9	250?, 150, 140, 95 dblt		poss Mi-2, other			no	876	9
016-016010	6494									yes	877
006-006031	6501	6502			56		poss 56	hi bkgd gel		no	878	32
006-006031	6502									yes	879
006-006026	6515	6516			63		poss KS	hi bkgd gel		no	880	32
006-006026	6516									yes	881
023-023001	6524	6525		12	125, 40		other			no	882	34	12
023-023001	6525									yes	883
007-007015	6533	6534		27	120, smear		other			no	884	27
007-007015	6534									yes	885
007-007006	6546	6547		27	115		other			no	886	27
007-007006	6547									yes	887
006-006052	6554	6555			200		other	mislabeled as sample 6556 on gel 12		no	888	12
006-006052	6555									yes	889
006-006035	6566	6567	69	12	negative	Ro yRNA	Ro 60	requires clinical testing for Ro/SSA, clear Ro60 on RNA, neg on protein	yes	no	890	Ro 60	34	12		2020-02-27
006-006035	6567									yes	891
008-008008	6575	6576		15	negative >40		negative >40	gel run off at 40		no	892	15
008-008008	6576									yes	893
008-008009	6582	6583		15	negative >40		negative >40	gel run off at 40		no	894	15
008-008009	6583									yes	895
037-037007	6588	6589		23	negative>37		negative >37			no	896	22	23
037-037007	6589									yes	897
037-037011	6598	6599	70	15	st 63, 52	st tRNA	KS, other			no	898	KS topo	Mi-2 EJ	35	15	2019-12-10
037-037011	6599									yes	899
105-105007	6633	6634		15	70		other			no	900	35	15
105-105007	6634									yes	901
105-105008	6644	6645		23	negative>37		negative >37			no	902	22	23
105-105008	6645									yes	903
105-105018	6651	6659		23	102, 100, 27		other			no	904	U3 OJ	39	22	23
105-105018	6659									yes	905
105-105005	6660	6666		21	61, st31?		poss 31, other			no	906	38	21
105-105005	6666									yes	907
012-012010	6670	6671		10	negative >65		negative >65	gel run off at 65		no	908	10
012-012010	6671									yes	909
012-012015	6679	6680		10	negative >65		negative >65	gel run off at 65		no	910	10
012-012015	6680									yes	911
008-008005	6688	6690		10	100	negative	other			no	912	33	PM-Scl	10		2020-03-02
008-008005	6690									yes	913
008-008003	6699	6700		28	negative		negative			no	914	28
008-008003	6700									yes	915
708-708005	6705	6707		28	negative		negative			no	916	28
708-708005	6707									yes	917
904-904006	6720	6727		28	80, 60, 40		poss Ro 60, other			no	918	42	28
904-904006	6727									yes	919
908-908009	6730	6736			negative (hi bkgd)		negative	hi bkgd gel		no	920	30
908-908009	6736									yes	921
008-008016	6807	6808		29	155, 63, st 60,		poss KS, poss Ro 60, other			no	922	43	29
008-008016	6808									yes	923
015-015002	6820	6821		29	63, 46		prob KS, other	compare ln 2		no	924	29
015-015002	6821									yes	925
012-012023	6826	6827		27	63, 41	tRNA?, smear	poss KS			no	926	U3 OJ	41	27		2020-03-20
012-012023	6827									yes	927
012-012024	6832	6833		27	110, 61		poss PL-12, other			no	928	27
012-012024	6833									yes	929
003-003032	6839	6840	71,72	23	st 63	tRNA	KS			no	930	KS topo	40	39	23	2019-12-10
003-003032	6840									yes	931
003-003037	6848	6849	73,74	24	KS, prob 56	tRNA? In one lane	poss KS, poss 56, other	check novel synthetase	yes	no	932	Ro 60	40	39	24	2020-02-27
003-003037	6849									yes	933
032-032023	6858	6859	75,76	24	st110, st 80 db, st 42	wtRNA	prob PL-12, other	on Mi-2 gel 80 kD not 76	no	no	934	Mi-2 EJ	RP Ku	40	39, 24	2020-01-27
032-032023	6859									yes	935
032-032024	6867	6869		24	negative>37		negative >37			no	936	24	21
032-032024	6869									yes	937		21
015-015022	7001	7002		9	negative		negative	mislabeled 7022 on gel 24		no	938	33	9	24
015-015022	7002									yes	939
016-016019	7006	7007		24	negative		negative			no	940	33	24	9
016-016019	7007									yes	941
003-003042	7019	7020		24	negative		negative			no	942	9	24
003-003042	7020									yes	943
003-003043	7028	7029		24	60		other			no	944	9	24
003-003043	7029									yes	945
003-003049	7260	7261		9	190?, 74, 63		poss KS, other			no	946	9
003-003049	7261									yes	947
004-004007	7269	7270	77	18	w63,37	negative	other	no band on good RNA gel		no	948	KS topo	U2 SAE	37	18	2019-12-10
004-004007	7270									yes	949
004-004011	7276	7278	78	18	33	hi RNA	poss U3			no	950	U2 SAE	37	18		2020-01-29
004-004011	7278									yes	951
907-907002	7285	7287		18	38?		poss Th			no	952	36	18
907-907002	7287									yes	953
607-607004	7349	7350	79	29	58,56,52,45, 33	U2?	prob 56, poss snRNP, other			no	954	43	U2 SAE	29		2020-01-29
607-607004	7350									yes	955
030-030009	7358	7359	80	10	190, 76	lo RNA?	other	lo sample load RP Ku gel		no	956	10	33	RP Ku		2020-01-27
030-030009	7359									yes	957
030-030010	7371	7372		10	negative		negative >65	gel run off at 65		no	958	10
030-030010	7372									yes	959
005-005003	7376	7377		10	w56		poss 56			no	960	33	10
005-005003	7377									yes	961
909-909005	7474	7475		12	negative		negative			no	962	34	12
909-909005	7475									yes	963
501-501002	7721	7722		18	negative>33		negative >33			no	964	18
501-501002	7722									yes	965
501-501001	7723	7724		18	mult hi bands, st 76, 60, 44,43, 32, 31,27,25		prob EJ, poss Ro 60, poss snRNP, other	check U5		no	966	Mi-2 EJ	37	18
501-501001	7724									yes	967
902-902009	7733	7734		18	108, 37, 35, 30	hi bands	prob PM-Scl, poss Th, poss 35, poss 31	requires clinical testing for PM-Scl		no	968	PM-Scl	37	18		2020-03-02
902-902009	7734									yes	969
005-005020	7751	7793			negative (hi bkgd)		negative	hi bkgd gel		no	970	30
005-005020	7793									yes	971
not on manifest	4191			23	170?, 75		other	not on manifest		no	980	23
